# Supplementary material for: Rap1 Is Involved in Angiopoietin-1-Induced Cell-Cell Junction Stabilization and Endothelial Cell Sprouting
Source: PubMed Central journal article supplement (PMC7016689; doi:10.3390/cells9010155), 2020-01-08
Supplement: cells-09-00155-s001.pdf [file cells-09-00155-s001.pdf]

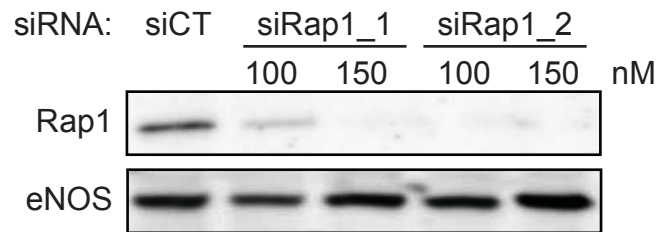

**Figure S1.** Validation of Rap1 siRNAs. BAECs were transfected with control siRNA (siCT) or with two distinct siRNAs targeting Rap1 (siRap1\_1 and siRap1\_2) and downregulation of Rap1 was confirmed by immunoblotting against Rap1. Western blot against eNOS was used as a loading control.
